# Supplementary material for: Perceived neighbourhood social cohesion and depressive symptom trajectories in older adults: a 12-year prospective cohort study
Source: Springer Nature journal article supplement (doi:10.1007/s00127-018-1548-4), 2018-06-18
Supplement: MOESM1 [file 127_2018_1548_MOESM1_ESM.pdf]

**Title:** Perceived neighbourhood social cohesion and depressive symptom trajectories in older adults: A twelve-year prospective cohort study

**Journal:** Social Psychiatry and Psychiatric Epidemiology

**Authors:** Milagros Ruiz, PhD, MSc<sup>1</sup>, Shaun Scholes, PhD, MSc<sup>1</sup>, Martin Bobak, PhD, MD, MSc<sup>1</sup>

**Affiliation and e-mail address of corresponding author:** <sup>1</sup>Research Department of Epidemiology and Public Health, University College London, 1-19 Torrington Place, London, WC1E 6BT, United Kingdom, m.a.ruiz@ucl.ac.uk

## Supplementary Material

|                                                                                                                                                                                                                             |   |
|-----------------------------------------------------------------------------------------------------------------------------------------------------------------------------------------------------------------------------|---|
| S1 Study characteristics of participants with $\leq 2$ depressive symptoms at baseline in the longitudinal analytic sample .....                                                                                            | 2 |
| S2 Poisson growth model of the number of depressive symptoms for participants with $\leq 2$ symptoms at baseline (2002/3 – 2014/5).....                                                                                     | 3 |
| S3 Predicted 12-year ageing vectors of depressive symptoms by high and low perceived social cohesion from the initial growth model for participants with $\leq 2$ symptoms at baseline (2002/3 – 2014/5) 4                  |   |
| S4 Predicted 12-year ageing vectors of depressive symptoms by high and low perceived social cohesion from the fully-adjusted growth model for participants with $\leq 2$ symptoms at baseline (2002/3 – 2014/5) 5           |   |
| S5 Kaplan-Meier failure plot of incident probable depression ( $3 \geq$ depressive symptoms) by tertiles of perceived social cohesion for participants with $\leq 2$ symptoms at baseline (2002/3 – 2014/5) .6              |   |
| S6 Discrete time proportional hazard model of incident probable depression ( $3 \geq$ depressive symptoms) by tertiles of perceived social cohesion for participants with $\leq 2$ symptoms at baseline (2002/3 – 2014/5) 6 |   |

## S1 Study characteristics of participants with $\leq 2$ depressive symptoms at baseline in the longitudinal analytic sample

| <b>Study data<sup>a</sup></b>                                 |                  |          |
|---------------------------------------------------------------|------------------|----------|
| <i>Longitudinal measures</i>                                  |                  |          |
| Number of depressive symptoms during the past week (0-8)      | <b>Mean</b>      | <b>N</b> |
| Wave 1 (2002/3)                                               | 0.6              | 8,269    |
| Wave 2 (2004/5)                                               | 1.1              | 6,516    |
| Wave 3 (2006/7)                                               | 1.0              | 5,590    |
| Wave 4 (2008/9)                                               | 1.0              | 4,927    |
| Wave 5 (2010/1)                                               | 1.1              | 4,594    |
| Wave 6 (2012/3)                                               | 1.0              | 4,201    |
| Wave 7 (2014/5)                                               | 1.0              | 3,637    |
| Probable depression ( $3 \geq$ symptoms during the past week) | <b>%</b>         | <b>N</b> |
| Wave 1 (2002/3)                                               | 0.0              | 8,269    |
| Wave 2 (2004/5)                                               | 14.0             | 6,516    |
| Wave 3 (2006/7)                                               | 13.1             | 5,590    |
| Wave 4 (2008/9)                                               | 14.3             | 4,927    |
| Wave 5 (2010/1)                                               | 15.4             | 4,594    |
| Wave 6 (2012/3)                                               | 13.4             | 4,201    |
| Wave 7 (2014/5)                                               | 13.8             | 3,637    |
| <i>Baseline measures</i>                                      |                  |          |
| Perceived social cohesion score (0-24)                        | <b>Mean or %</b> | <b>N</b> |
| High (22 – 24)                                                | 33.1             | 2,737    |
| Medium (18 – 21)                                              | 34.0             | 2,811    |
| Low (0 – 17)                                                  | 28.2             | 2,721    |
| Baseline age                                                  | 64.6             | 8,269    |
| Female                                                        | 51.0             | 4,217    |
| Non-white                                                     | 2.2              | 182      |
| Self-reported ever doctor-diagnosis of depression             | 3.3              | 273      |
| No educational qualification                                  | 38.7             | 3,200    |
| Work status                                                   |                  |          |
| Employed                                                      | 36.9             | 3,051    |
| Retired                                                       | 49.5             | 4,093    |
| Economically inactive                                         | 4.2              | 347      |
| Permanently sick/disabled                                     | 9.4              | 777      |
| Total non-pension wealth                                      |                  |          |
| 1 (Richest)                                                   | 15.7             | 1,298    |
| 2                                                             | 18.4             | 1,521    |
| 3                                                             | 20.7             | 1,712    |
| 4                                                             | 22.1             | 1,827    |
| 5                                                             | 23.1             | 1,910    |
| Self-rated health                                             |                  |          |
| Very good                                                     | 23.9             | 1,976    |
| Good                                                          | 38.3             | 3,167    |
| Fair                                                          | 25.9             | 2,142    |
| Poor                                                          | 11.9             | 984      |
| Self-reported limiting long-term illness                      | 26.4             | 2,183    |

a: The estimates are averaged over the multiply imputed data sets, and corrected for the study's non-response at wave 1. The longitudinal analytic sample (n=8,269) includes participants with varying observations of valid data on depressive symptoms across waves.

**S2 Poisson growth model of the number of depressive symptoms for participants with  $\leq 2$  symptoms at baseline (2002/3 – 2014/5)**

| <b>Growth parameters</b>          | <b>Initial model<sup>a</sup></b> |           |          | <b>Fully-adjusted model<sup>b</sup></b> |           |          |
|-----------------------------------|----------------------------------|-----------|----------|-----------------------------------------|-----------|----------|
|                                   | <b>b</b>                         | <b>SE</b> | <b>P</b> | <b>b</b>                                | <b>SE</b> | <b>P</b> |
| Intercept                         | -0.814                           | 0.032     | <0.001   | -0.977                                  | 0.048     | <0.001   |
| Intercept regressed on            |                                  |           |          |                                         |           |          |
| Female                            | 0.336                            | 0.025     | <0.001   | 0.340                                   | 0.025     | <0.001   |
| Baseline age (years) <sup>d</sup> | 0.016                            | 0.002     | <0.001   | 0.009                                   | 0.002     | <0.001   |
| Medium PSC                        | 0.096                            | 0.035     | 0.006    | 0.094                                   | 0.035     | 0.007    |
| Low PSC                           | 0.244                            | 0.034     | <0.001   | 0.195                                   | 0.033     | <0.001   |
| Baseline age x medium PSC         | -0.004                           | 0.003     | 0.259    | -0.003                                  | 0.003     | 0.294    |
| Baseline age x low PSC            | -0.007                           | 0.003     | 0.016    | -0.008                                  | 0.003     | 0.010    |
| Slope <sup>c</sup>                | 0.274                            | 0.058     | <0.001   | 0.453                                   | 0.019     | <0.001   |
| Slope regressed on                |                                  |           |          |                                         |           |          |
| Female                            | 0.086                            | 0.041     | 0.036    | 0.043                                   | 0.042     | 0.312    |
| Baseline age (years)              | 0.023                            | 0.004     | <0.001   | 0.021                                   | 0.004     | <0.001   |
| Medium PSC                        | 0.002                            | 0.056     | 0.968    | 0.010                                   | 0.056     | 0.858    |
| Low PSC                           | 0.122                            | 0.056     | 0.030    | 0.121                                   | 0.057     | 0.032    |
| Baseline age x medium PSC         | 0.012                            | 0.006     | 0.045    | 0.011                                   | 0.006     | 0.067    |
| Baseline age x low PSC            | 0.017                            | 0.006     | 0.003    | 0.016                                   | 0.006     | 0.007    |
| Intercept variance                | 0.545                            | 0.020     | <0.001   | 0.788                                   | 0.038     | <0.001   |
| Slope variance                    | 0.423                            | 0.038     | <0.001   | 0.420                                   | 0.038     | <0.001   |
| Intercept – Slope covariance      | 0.156                            | 0.023     | <0.001   | 0.125                                   | 0.021     | <0.001   |

a: Adjusted for the covariates shown in the table, plus white/non-white group and self-reported ever doctor-diagnosis of depression.

b: Adjusted for the covariates shown in the table, plus white/non-white group, self-reported ever doctor-diagnosis of depression, educational qualification, work status, total non-pension wealth, self-rated health, and self-reported limiting long-term illness.

c: As the time scale (years) was divided by 12, the average slope and effect of covariates on the slope describe the total rate of change over the twelve-year study period.

d: Centred at 65 years.

**S3 Predicted 12-year ageing vectors of depressive symptoms by high and low perceived social cohesion from the initial growth model for participants with  $\leq 2$  symptoms at baseline (2002/3 – 2014/5)**

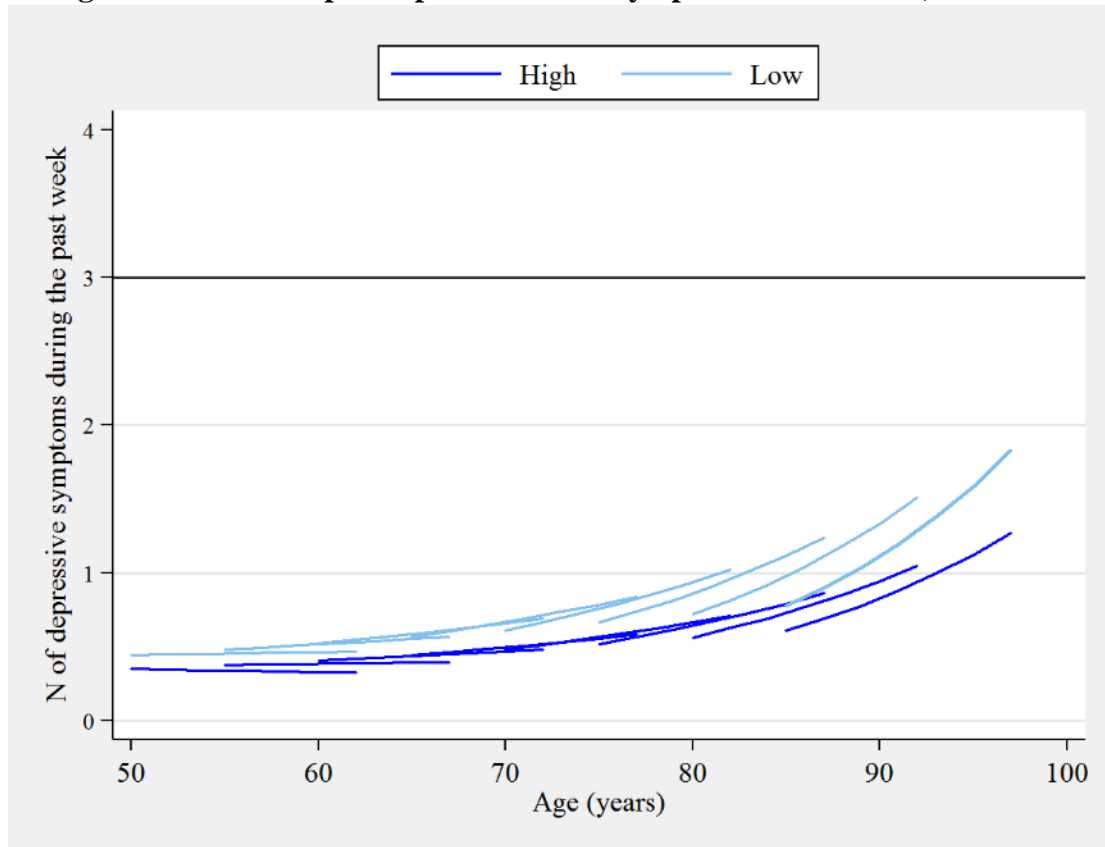

*Note:* Estimates are adjusted for gender, white/non-white group and self-reported ever doctor-diagnosis of depression.

**S4 Predicted 12-year ageing vectors of depressive symptoms by high and low perceived social cohesion from the fully-adjusted growth model for participants with  $\leq 2$  symptoms at baseline (2002/3 – 2014/5)**

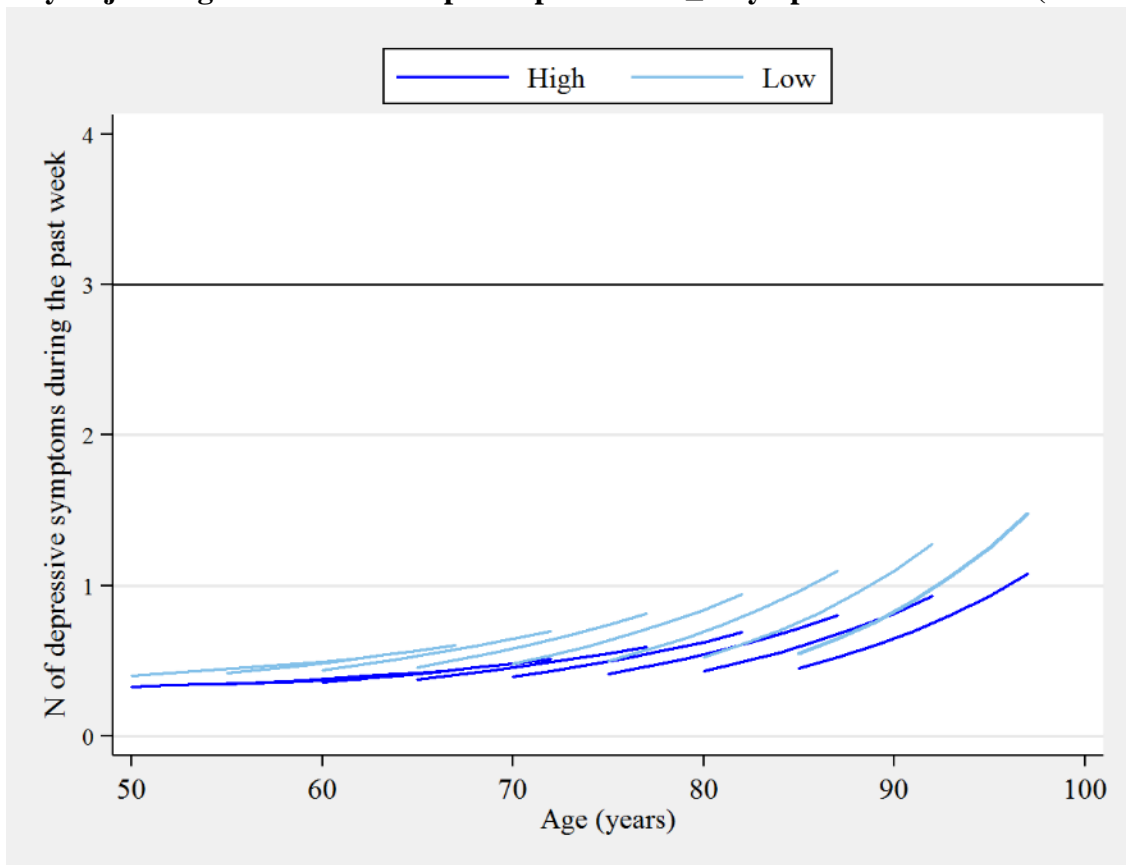

*Note:* Estimates are adjusted for gender, white/non-white group, self-reported ever doctor-diagnosis of depression, educational qualification, work status, total non-pension wealth, self-rated health, and self-reported limiting long-term illness.

**S5 Kaplan-Meier failure plot of incident probable depression ( $3 \geq$  depressive symptoms) by tertiles of perceived social cohesion for participants with  $\leq 2$  symptoms at baseline (2002/3 – 2014/5)**

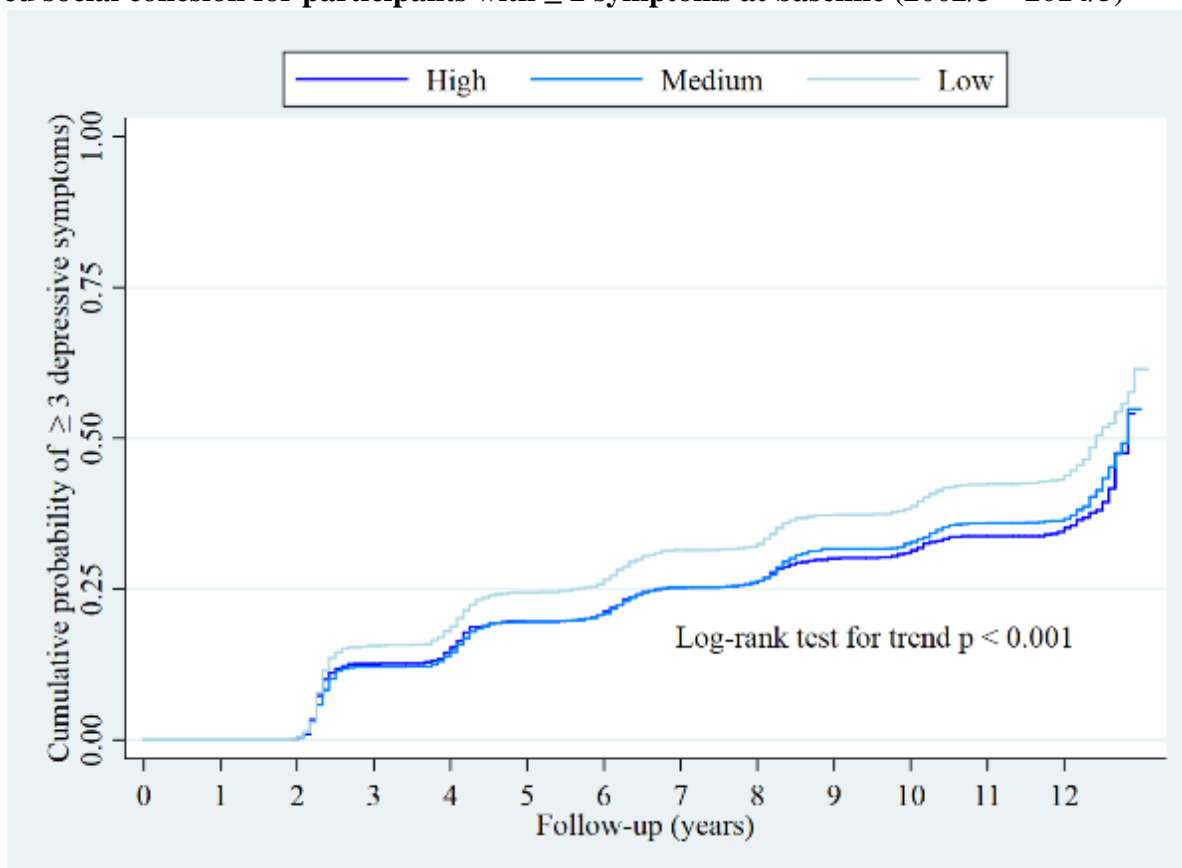

*Note:* Follow-up time (months) was rescaled to years for ease of interpretation.

**S6 Discrete time proportional hazard model of incident probable depression ( $3 \geq$  depressive symptoms) by tertiles of perceived social cohesion for participants with  $\leq 2$  symptoms at baseline (2002/3 – 2014/5)**

| Estimates                         | Initial model <sup>a</sup> |       |        | Fully-adjusted model <sup>b</sup> |       |        |
|-----------------------------------|----------------------------|-------|--------|-----------------------------------|-------|--------|
|                                   | HR                         | SE    | P      | HR                                | SE    | P      |
| Female                            | 1.529                      | 0.069 | <0.001 | 1.477                             | 0.069 | <0.001 |
| Baseline age (years) <sup>c</sup> | 1.042                      | 0.003 | <0.001 | 1.036                             | 0.003 | <0.001 |
| Perceived social cohesion         |                            |       |        |                                   |       |        |
| High                              | 1.000                      | -     | -      | 1.000                             | -     | -      |
| Medium                            | 1.090                      | 0.064 | 0.142  | 1.089                             | 0.063 | 0.138  |
| Low                               | 1.437                      | 0.082 | <0.001 | 1.356                             | 0.076 | <0.001 |

a: Adjusted for the covariates shown in the table, plus white/non-white group and self-reported ever doctor-diagnosis of depression.

b: Adjusted for the covariates shown in the table, plus white/non-white group, self-reported ever doctor-diagnosis of depression, educational qualification, work status, total non-pension wealth, self-rated health, and self-reported limiting long-term illness.

c: Centred at 65 years.
